# Supplementary material for: New targets acquired: Improving locus recovery from the Angiosperms353 probe set
Source: PubMed Central journal article supplement (PMC8312740; doi:10.1002/aps3.11420), 2021-06-14

**APPENDIX S10.** Heatmap of locus lengths for each sample for each locus for the *Bulbophyllum* data set, where the default353 locus lengths are subtracted from the mega353 (family + genus filtered) locus lengths. Increases in length are shown in blue; decreases in length are shown in red.

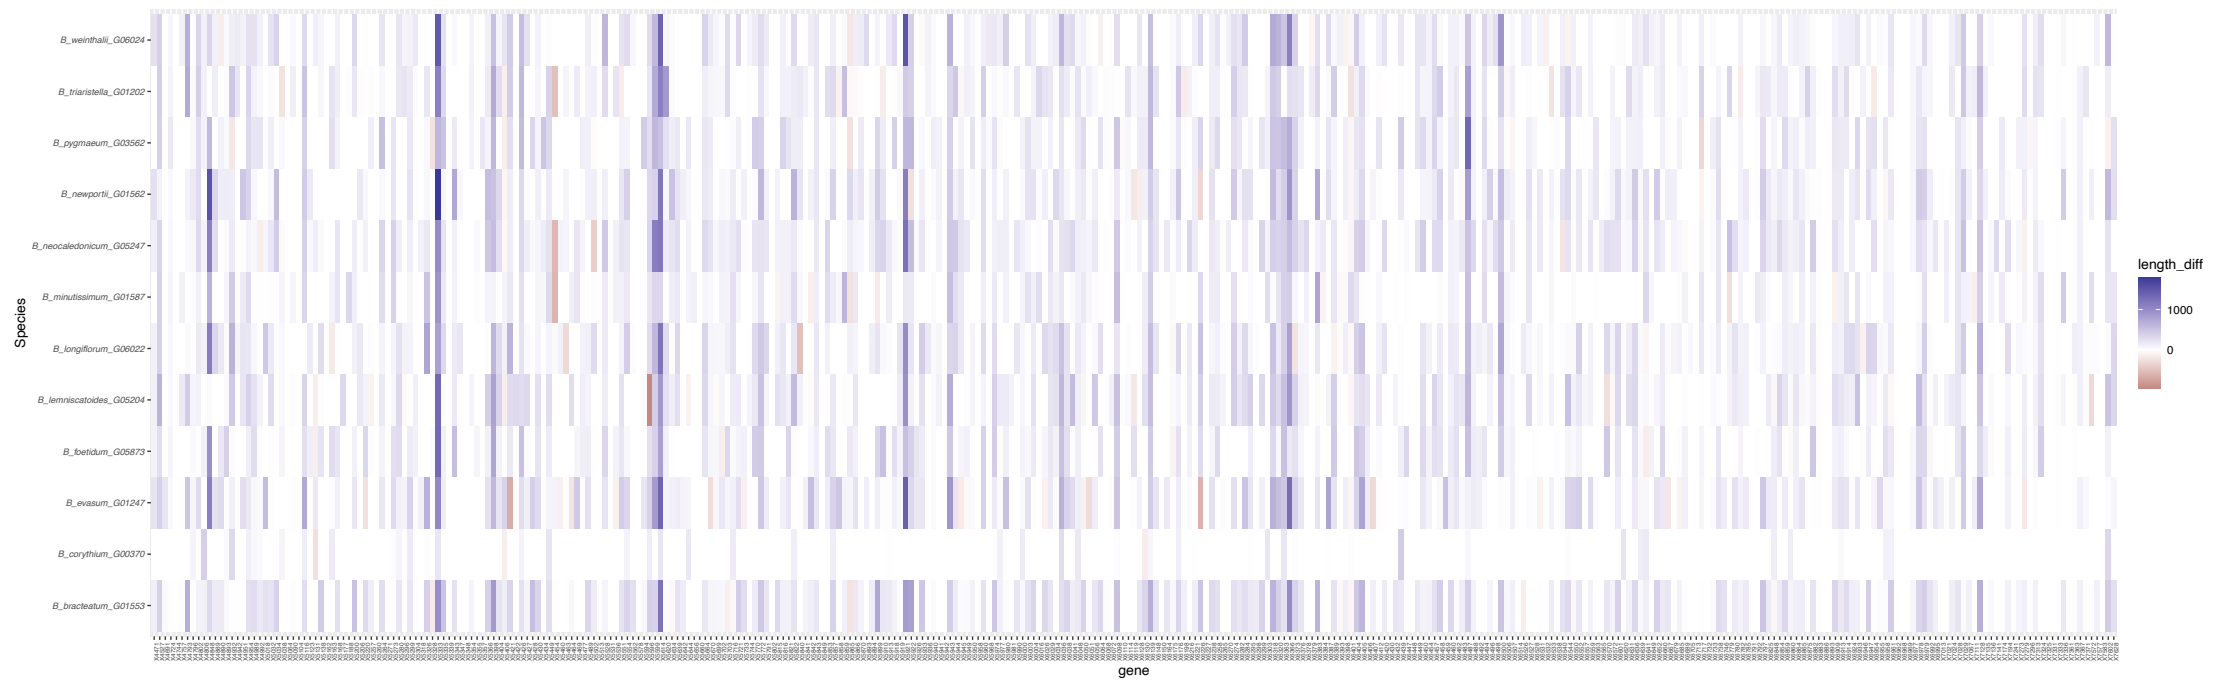

Supplement: APS3-9--s007.pdf [file APS3-9--s007.pdf]
