# Supplementary material for: New targets acquired: Improving locus recovery from the Angiosperms353 probe set
Source: PubMed Central journal article supplement (PMC8312740; doi:10.1002/aps3.11420), 2021-06-14

**APPENDIX S11.** Heatmap of locus lengths for each sample for each locus for the Cyperaceae data set, where the default353 locus lengths are subtracted from the mega353 (family filtered) locus lengths. Increases in length are shown in blue; decreases in length are shown in red.

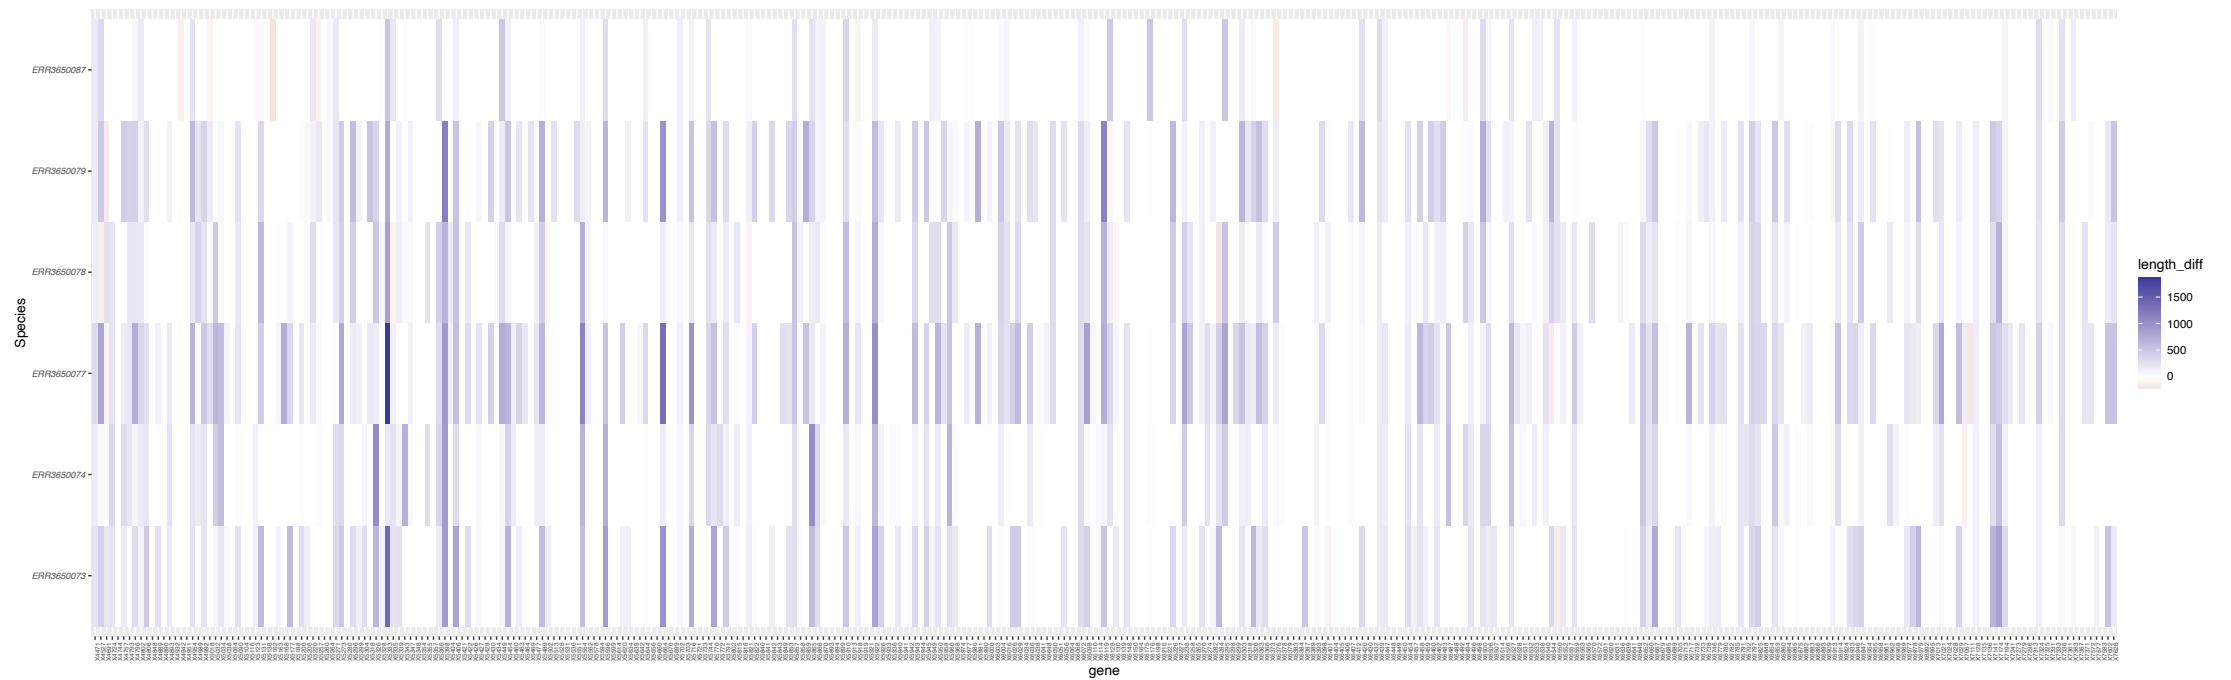

Supplement: APS3-9--s008.pdf [file APS3-9--s008.pdf]
